# Supplementary material
Source: publisher figshare collection journal article supplement (https://acs.figshare.com/ndownloader/files/5935224)
Supplement: Supplementary file 1 [file 5935224]

 
data_II
 
_audit_creation_method            SHELXL-97 
_chemical_name_systematic 
; 
 ? 
; 
_chemical_name_common             ? 
_chemical_melting_point           ? 
_chemical_formula_moiety          'C27 H18 N2 O4 S2' 
_chemical_formula_sum 
 'C27 H18 N2 O4 S2' 
_chemical_formula_weight          498.55 
 
loop_ 
 _atom_type_symbol 
 _atom_type_description 
 _atom_type_scat_dispersion_real 
 _atom_type_scat_dispersion_imag 
 _atom_type_scat_source 
 'C'  'C'   0.0033   0.0016 
 'International Tables Vol C Tables 4.2.6.8 and 6.1.1.4' 
 'H'  'H'   0.0000   0.0000 
 'International Tables Vol C Tables 4.2.6.8 and 6.1.1.4' 
 'N'  'N'   0.0061   0.0033 
 'International Tables Vol C Tables 4.2.6.8 and 6.1.1.4' 
 'O'  'O'   0.0106   0.0060 
 'International Tables Vol C Tables 4.2.6.8 and 6.1.1.4' 
 'S'  'S'   0.1246   0.1234 
 'International Tables Vol C Tables 4.2.6.8 and 6.1.1.4' 
 
_symmetry_cell_setting            Monoclinic 
_symmetry_space_group_name_H-M    'P 21/n'
_symmetry_space_group_name_Hall   '-P 2yn'
 
loop_ 
 _symmetry_equiv_pos_as_xyz 
 'x, y, z' 
 '-x+1/2, y+1/2, -z+1/2' 
 '-x, -y, -z' 
 'x-1/2, -y-1/2, z-1/2' 
 
_cell_length_a                    12.5052(8) 
_cell_length_b                    11.2594(6) 
_cell_length_c                    17.0731(9) 
_cell_angle_alpha                 90.00 
_cell_angle_beta                  102.914(2) 
_cell_angle_gamma                 90.00 
_cell_volume                      2343.1(2) 
_cell_formula_units_Z             4 
_cell_measurement_temperature     296(2) 
_cell_measurement_reflns_used     5098 
_cell_measurement_theta_min       2.18
_cell_measurement_theta_max       27.00
 
_exptl_crystal_description        block 
_exptl_crystal_colour             colourless
_exptl_crystal_size_max           0.35
_exptl_crystal_size_mid           0.30
_exptl_crystal_size_min           0.25
_exptl_crystal_density_meas       ? 
_exptl_crystal_density_diffrn     1.413 
_exptl_crystal_density_method     'not measured' 
_exptl_crystal_F_000              1032 
_exptl_absorpt_coefficient_mu     0.265 
_exptl_absorpt_correction_type    multi-scan 
_exptl_absorpt_correction_T_min   0.911 
_exptl_absorpt_correction_T_max   0.936
_exptl_absorpt_process_details    'SADABS (Bruker, 2008)' 
 
_exptl_special_details 
; 
 ? 
; 
 
_diffrn_ambient_temperature       296(2) 
_diffrn_radiation_wavelength      0.71073 
_diffrn_radiation_type            MoK\a 
_diffrn_radiation_source          'fine-focus sealed tube' 
_diffrn_radiation_monochromator   graphite 
_diffrn_measurement_device_type   
'Bruker Kappa ApexII CCD Diffractometer' 
_diffrn_measurement_method        '\w & \f scans'
_diffrn_detector_area_resol_mean  ? 
_diffrn_standards_number          ? 
_diffrn_standards_interval_count  ? 
_diffrn_standards_interval_time   ? 
_diffrn_standards_decay_%         ? 
_diffrn_reflns_number             44472 
_diffrn_reflns_av_R_equivalents   0.0341 
_diffrn_reflns_av_sigmaI/netI     0.0228 
_diffrn_reflns_limit_h_min        -15 
_diffrn_reflns_limit_h_max        15 
_diffrn_reflns_limit_k_min        -14 
_diffrn_reflns_limit_k_max        14 
_diffrn_reflns_limit_l_min        -21 
_diffrn_reflns_limit_l_max        21 
_diffrn_reflns_theta_min          2.18 
_diffrn_reflns_theta_max          27.00 
_reflns_number_total              5098 
_reflns_number_gt                 3714 
_reflns_threshold_expression      >2sigma(I) 
 
_computing_data_collection        ? 
_computing_cell_refinement        ? 
_computing_data_reduction         ? 
_computing_structure_solution     'SHELXS-97 (Sheldrick, 1990)' 
_computing_structure_refinement   'SHELXL-97 (Sheldrick, 1997)' 
_computing_molecular_graphics     ? 
_computing_publication_material   ? 
 
_refine_special_details 
; 
 Refinement of F^2^ against ALL reflections.  The weighted R-factor wR and 
 goodness of fit S are based on F^2^, conventional R-factors R are based 
 on F, with F set to zero for negative F^2^. The threshold expression of 
 F^2^ > 2sigma(F^2^) is used only for calculating R-factors(gt) etc. and is 
 not relevant to the choice of reflections for refinement.  R-factors based 
 on F^2^ are statistically about twice as large as those based on F, and R- 
 factors based on ALL data will be even larger. 
; 
 
_refine_ls_structure_factor_coef  Fsqd  
_refine_ls_matrix_type            full 
_refine_ls_weighting_scheme       calc  
_refine_ls_weighting_details 
 'calc w=1/[\s^2^(Fo^2^)+(0.0625P)^2^+2.4597P] where P=(Fo^2^+2Fc^2^)/3' 
_atom_sites_solution_primary      direct 
_atom_sites_solution_secondary    difmap 
_atom_sites_solution_hydrogens    geom 
_refine_ls_hydrogen_treatment     constr 
_refine_ls_extinction_method      none 
_refine_ls_extinction_coef        ? 
_refine_ls_number_reflns          5098 
_refine_ls_number_parameters      317 
_refine_ls_number_restraints      0 
_refine_ls_R_factor_all           0.0840 
_refine_ls_R_factor_gt            0.0549 
_refine_ls_wR_factor_ref          0.1628 
_refine_ls_wR_factor_gt           0.1359 
_refine_ls_goodness_of_fit_ref    1.081 
_refine_ls_restrained_S_all       1.081 
_refine_ls_shift/su_max           0.001 
_refine_ls_shift/su_mean          0.000 

 
loop_ 
 _atom_site_label 
 _atom_site_type_symbol 
 _atom_site_fract_x 
 _atom_site_fract_y 
 _atom_site_fract_z 
 _atom_site_U_iso_or_equiv 
 _atom_site_adp_type 
 _atom_site_occupancy 
 _atom_site_symmetry_multiplicity 
 _atom_site_calc_flag 
 _atom_site_refinement_flags 
 _atom_site_disorder_assembly 
 _atom_site_disorder_group 
C1 C 0.6060(2) 0.1940(2) 0.88313(17) 0.0421(6) Uani 1 1 d . . . 
C2 C 0.5786(3) 0.2854(3) 0.8277(2) 0.0560(8) Uani 1 1 d . . . 
H2 H 0.5843 0.3645 0.8438 0.067 Uiso 1 1 calc R . . 
C3 C 0.5428(3) 0.2549(3) 0.7482(2) 0.0629(9) Uani 1 1 d . . . 
H3 H 0.5242 0.3146 0.7100 0.076 Uiso 1 1 calc R . . 
C4 C 0.5337(3) 0.1379(3) 0.7237(2) 0.0630(9) Uani 1 1 d . . . 
H4 H 0.5083 0.1203 0.6695 0.076 Uiso 1 1 calc R . . 
C5 C 0.5617(3) 0.0466(3) 0.77819(17) 0.0507(7) Uani 1 1 d . . . 
H5 H 0.5563 -0.0321 0.7612 0.061 Uiso 1 1 calc R . . 
C6 C 0.5983(2) 0.0746(2) 0.85963(16) 0.0390(6) Uani 1 1 d . . . 
C7 C 0.6289(2) 0.0029(2) 0.93182(15) 0.0353(5) Uani 1 1 d . . . 
C8 C 0.6519(2) 0.0804(2) 0.99818(16) 0.0360(6) Uani 1 1 d . . . 
C9 C 0.6769(2) 0.0413(2) 1.07626(16) 0.0393(6) Uani 1 1 d . . . 
H9 H 0.6918 0.0937 1.1194 0.047 Uiso 1 1 calc R . . 
C10 C 0.6786(2) -0.0812(2) 1.08735(15) 0.0380(6) Uani 1 1 d . . . 
C11 C 0.6568(2) -0.1622(2) 1.02287(15) 0.0353(5) Uani 1 1 d . . . 
C12 C 0.6333(2) -0.1197(2) 0.94342(15) 0.0350(5) Uani 1 1 d . . . 
C13 C 0.8439(2) 0.2964(3) 0.98979(17) 0.0444(7) Uani 1 1 d . . . 
C14 C 0.9114(3) 0.2047(3) 1.02417(19) 0.0523(7) Uani 1 1 d . . . 
H14 H 0.8886 0.1524 1.0593 0.063 Uiso 1 1 calc R . . 
C15 C 1.0125(3) 0.1910(4) 1.0062(2) 0.0681(10) Uani 1 1 d . . . 
H15 H 1.0580 0.1287 1.0286 0.082 Uiso 1 1 calc R . . 
C16 C 1.0457(3) 0.2685(5) 0.9557(3) 0.0828(12) Uani 1 1 d . . . 
H16 H 1.1145 0.2595 0.9442 0.099 Uiso 1 1 calc R . . 
C17 C 0.9798(4) 0.3593(5) 0.9214(3) 0.0950(15) Uani 1 1 d . . . 
H17 H 1.0039 0.4117 0.8869 0.114 Uiso 1 1 calc R . . 
C18 C 0.8765(3) 0.3741(4) 0.9378(2) 0.0734(11) Uani 1 1 d . . . 
H18 H 0.8306 0.4353 0.9141 0.088 Uiso 1 1 calc R . . 
C19 C 0.6151(2) -0.2052(2) 0.87505(15) 0.0354(5) Uani 1 1 d . . . 
C20 C 0.5183(3) -0.2687(3) 0.8546(2) 0.0537(8) Uani 1 1 d . . . 
H20 H 0.4651 -0.2592 0.8844 0.064 Uiso 1 1 calc R . . 
C21 C 0.4998(3) -0.3460(3) 0.7902(2) 0.0554(8) Uani 1 1 d . . . 
H21 H 0.4339 -0.3872 0.7755 0.066 Uiso 1 1 calc R . . 
C22 C 0.5802(2) -0.3609(2) 0.74851(17) 0.0430(6) Uani 1 1 d . . . 
C23 C 0.6776(3) -0.3018(3) 0.7681(2) 0.0584(8) Uani 1 1 d . . . 
H23 H 0.7316 -0.3145 0.7393 0.070 Uiso 1 1 calc R . . 
C24 C 0.6946(3) -0.2227(3) 0.83157(19) 0.0530(8) Uani 1 1 d . . . 
H24 H 0.7603 -0.1808 0.8451 0.064 Uiso 1 1 calc R . . 
C25 C 0.6646(2) -0.2867(2) 1.05077(16) 0.0384(6) Uani 1 1 d . . . 
H25 H 0.6526 -0.3528 1.0173 0.046 Uiso 1 1 calc R . . 
C26 C 0.6920(3) -0.2909(3) 1.13273(18) 0.0481(7) Uani 1 1 d . . . 
C27 C 0.7108(4) -0.4006(3) 1.1839(2) 0.0752(11) Uani 1 1 d . . . 
H27A H 0.6932 -0.4696 1.1504 0.113 Uiso 1 1 calc R . . 
H27B H 0.6649 -0.3984 1.2220 0.113 Uiso 1 1 calc R . . 
H27C H 0.7863 -0.4042 1.2120 0.113 Uiso 1 1 calc R . . 
N1 N 0.63886(19) 0.19994(19) 0.96867(14) 0.0411(5) Uani 1 1 d . . . 
N3 N 0.5598(3) -0.4437(2) 0.68031(17) 0.0575(7) Uani 1 1 d . . . 
O1 O 0.6654(2) 0.41840(19) 0.97874(17) 0.0737(7) Uani 1 1 d . . . 
O2 O 0.7283(2) 0.2925(2) 1.09819(14) 0.0612(6) Uani 1 1 d . . . 
O3 O 0.6358(2) -0.4681(3) 0.64951(16) 0.0852(9) Uani 1 1 d . . . 
O4 O 0.4680(2) -0.4842(2) 0.65747(15) 0.0764(8) Uani 1 1 d . . . 
S1 S 0.71501(7) 0.31228(6) 1.01429(5) 0.0488(2) Uani 1 1 d . . . 
S2 S 0.70681(7) -0.15330(7) 1.17880(5) 0.0540(2) Uani 1 1 d . . . 
 
loop_ 
 _atom_site_aniso_label 
 _atom_site_aniso_U_11 
 _atom_site_aniso_U_22 
 _atom_site_aniso_U_33 
 _atom_site_aniso_U_23 
 _atom_site_aniso_U_13 
 _atom_site_aniso_U_12 
C1 0.0383(14) 0.0378(14) 0.0512(16) 0.0049(12) 0.0117(12) 0.0024(11) 
C2 0.0580(19) 0.0376(16) 0.070(2) 0.0135(14) 0.0098(16) 0.0046(14) 
C3 0.068(2) 0.056(2) 0.062(2) 0.0246(16) 0.0081(17) 0.0058(17) 
C4 0.076(2) 0.064(2) 0.0454(17) 0.0115(15) 0.0045(16) 0.0001(18) 
C5 0.0607(19) 0.0443(16) 0.0439(16) 0.0012(13) 0.0049(14) -0.0027(14) 
C6 0.0370(14) 0.0362(13) 0.0443(15) 0.0033(11) 0.0102(11) -0.0005(11) 
C7 0.0330(13) 0.0342(13) 0.0389(13) -0.0021(10) 0.0084(10) -0.0026(10) 
C8 0.0336(13) 0.0287(12) 0.0467(15) -0.0034(10) 0.0113(11) -0.0012(10) 
C9 0.0426(14) 0.0370(14) 0.0381(14) -0.0077(11) 0.0088(11) -0.0033(11) 
C10 0.0356(13) 0.0426(14) 0.0360(14) -0.0002(11) 0.0085(11) -0.0020(11) 
C11 0.0312(13) 0.0345(13) 0.0408(14) -0.0003(10) 0.0090(10) -0.0019(10) 
C12 0.0324(13) 0.0331(13) 0.0397(13) -0.0028(10) 0.0086(10) -0.0031(10) 
C13 0.0502(16) 0.0416(15) 0.0404(14) -0.0014(12) 0.0083(12) -0.0122(12) 
C14 0.0515(18) 0.0548(18) 0.0495(17) 0.0041(14) 0.0086(14) -0.0044(14) 
C15 0.0485(19) 0.083(3) 0.069(2) 0.003(2) 0.0052(16) 0.0033(18) 
C16 0.053(2) 0.120(4) 0.078(3) 0.008(3) 0.0189(19) -0.009(2) 
C17 0.081(3) 0.127(4) 0.083(3) 0.037(3) 0.033(2) -0.025(3) 
C18 0.068(2) 0.072(2) 0.077(2) 0.031(2) 0.0093(19) -0.0114(19) 
C19 0.0390(14) 0.0305(12) 0.0372(13) -0.0005(10) 0.0095(11) -0.0021(10) 
C20 0.0456(16) 0.0564(18) 0.0641(19) -0.0197(15) 0.0229(14) -0.0131(14) 
C21 0.0454(17) 0.0556(19) 0.065(2) -0.0174(15) 0.0112(15) -0.0183(14) 
C22 0.0515(17) 0.0332(13) 0.0426(15) -0.0085(11) 0.0073(12) 0.0001(12) 
C23 0.0527(19) 0.067(2) 0.061(2) -0.0215(16) 0.0251(15) -0.0067(16) 
C24 0.0452(16) 0.0556(18) 0.0625(19) -0.0201(15) 0.0214(14) -0.0181(14) 
C25 0.0374(14) 0.0387(14) 0.0404(14) 0.0083(11) 0.0111(11) 0.0032(11) 
C26 0.0526(17) 0.0401(15) 0.0525(17) 0.0087(13) 0.0141(14) 0.0009(13) 
C27 0.107(3) 0.054(2) 0.067(2) 0.0234(18) 0.024(2) 0.007(2) 
N1 0.0429(13) 0.0302(11) 0.0495(13) -0.0027(9) 0.0090(10) -0.0007(9) 
N3 0.0718(19) 0.0403(14) 0.0557(16) -0.0111(12) 0.0042(14) 0.0055(13) 
O1 0.0784(17) 0.0302(11) 0.110(2) -0.0106(12) 0.0149(15) 0.0067(11) 
O2 0.0765(16) 0.0538(13) 0.0604(14) -0.0233(11) 0.0305(12) -0.0182(11) 
O3 0.091(2) 0.089(2) 0.0763(18) -0.0387(15) 0.0199(15) 0.0123(16) 
O4 0.0852(19) 0.0568(15) 0.0761(17) -0.0265(13) -0.0053(14) -0.0123(13) 
S1 0.0555(5) 0.0301(3) 0.0626(5) -0.0105(3) 0.0172(4) -0.0035(3) 
S2 0.0641(5) 0.0519(5) 0.0441(4) 0.0038(3) 0.0081(4) -0.0033(4) 
 
_geom_special_details 
; 
 All esds (except the esd in the dihedral angle between two l.s. planes) 
 are estimated using the full covariance matrix.  The cell esds are taken 
 into account individually in the estimation of esds in distances, angles 
 and torsion angles; correlations between esds in cell parameters are only 
 used when they are defined by crystal symmetry.  An approximate (isotropic) 
 treatment of cell esds is used for estimating esds involving l.s. planes. 
; 
 
loop_ 
 _geom_bond_atom_site_label_1 
 _geom_bond_atom_site_label_2 
 _geom_bond_distance 
 _geom_bond_site_symmetry_2 
 _geom_bond_publ_flag 
C1 C2 1.388(4) . ? 
C1 C6 1.400(4) . ? 
C1 N1 1.428(4) . ? 
C2 C3 1.374(5) . ? 
C2 H2 0.9300 . ? 
C3 C4 1.379(5) . ? 
C3 H3 0.9300 . ? 
C4 C5 1.378(4) . ? 
C4 H4 0.9300 . ? 
C5 C6 1.399(4) . ? 
C5 H5 0.9300 . ? 
C6 C7 1.452(4) . ? 
C7 C12 1.394(4) . ? 
C7 C8 1.408(4) . ? 
C8 C9 1.372(4) . ? 
C8 N1 1.434(3) . ? 
C9 C10 1.391(4) . ? 
C9 H9 0.9300 . ? 
C10 C11 1.408(4) . ? 
C10 S2 1.725(3) . ? 
C11 C12 1.406(4) . ? 
C11 C25 1.477(3) . ? 
C12 C19 1.491(3) . ? 
C13 C18 1.372(4) . ? 
C13 C14 1.379(4) . ? 
C13 S1 1.762(3) . ? 
C14 C15 1.374(5) . ? 
C14 H14 0.9300 . ? 
C15 C16 1.357(6) . ? 
C15 H15 0.9300 . ? 
C16 C17 1.360(6) . ? 
C16 H16 0.9300 . ? 
C17 C18 1.391(6) . ? 
C17 H17 0.9300 . ? 
C18 H18 0.9300 . ? 
C19 C24 1.381(4) . ? 
C19 C20 1.382(4) . ? 
C20 C21 1.381(4) . ? 
C20 H20 0.9300 . ? 
C21 C22 1.365(4) . ? 
C21 H21 0.9300 . ? 
C22 C23 1.363(4) . ? 
C22 N3 1.468(4) . ? 
C23 C24 1.383(4) . ? 
C23 H23 0.9300 . ? 
C24 H24 0.9300 . ? 
C25 C26 1.365(4) . ? 
C25 H25 0.9300 . ? 
C26 C27 1.501(4) . ? 
C26 S2 1.729(3) . ? 
C27 H27A 0.9600 . ? 
C27 H27B 0.9600 . ? 
C27 H27C 0.9600 . ? 
N1 S1 1.668(2) . ? 
N3 O4 1.215(4) . ? 
N3 O3 1.216(4) . ? 
O1 S1 1.419(2) . ? 
O2 S1 1.422(2) . ? 
 
loop_ 
 _geom_angle_atom_site_label_1 
 _geom_angle_atom_site_label_2 
 _geom_angle_atom_site_label_3 
 _geom_angle 
 _geom_angle_site_symmetry_1 
 _geom_angle_site_symmetry_3 
 _geom_angle_publ_flag 
C2 C1 C6 121.7(3) . . ? 
C2 C1 N1 129.3(3) . . ? 
C6 C1 N1 108.9(2) . . ? 
C3 C2 C1 117.7(3) . . ? 
C3 C2 H2 121.2 . . ? 
C1 C2 H2 121.2 . . ? 
C2 C3 C4 121.7(3) . . ? 
C2 C3 H3 119.2 . . ? 
C4 C3 H3 119.2 . . ? 
C5 C4 C3 121.1(3) . . ? 
C5 C4 H4 119.4 . . ? 
C3 C4 H4 119.4 . . ? 
C4 C5 C6 118.6(3) . . ? 
C4 C5 H5 120.7 . . ? 
C6 C5 H5 120.7 . . ? 
C5 C6 C1 119.2(3) . . ? 
C5 C6 C7 133.1(3) . . ? 
C1 C6 C7 107.6(2) . . ? 
C12 C7 C8 120.3(2) . . ? 
C12 C7 C6 131.8(2) . . ? 
C8 C7 C6 107.8(2) . . ? 
C9 C8 C7 123.0(2) . . ? 
C9 C8 N1 128.8(2) . . ? 
C7 C8 N1 108.2(2) . . ? 
C8 C9 C10 116.3(2) . . ? 
C8 C9 H9 121.8 . . ? 
C10 C9 H9 121.8 . . ? 
C9 C10 C11 122.7(2) . . ? 
C9 C10 S2 125.7(2) . . ? 
C11 C10 S2 111.6(2) . . ? 
C12 C11 C10 119.7(2) . . ? 
C12 C11 C25 128.2(2) . . ? 
C10 C11 C25 112.0(2) . . ? 
C7 C12 C11 117.8(2) . . ? 
C7 C12 C19 122.3(2) . . ? 
C11 C12 C19 119.9(2) . . ? 
C18 C13 C14 120.7(3) . . ? 
C18 C13 S1 120.6(3) . . ? 
C14 C13 S1 118.7(2) . . ? 
C15 C14 C13 119.7(3) . . ? 
C15 C14 H14 120.2 . . ? 
C13 C14 H14 120.2 . . ? 
C16 C15 C14 119.8(4) . . ? 
C16 C15 H15 120.1 . . ? 
C14 C15 H15 120.1 . . ? 
C15 C16 C17 121.0(4) . . ? 
C15 C16 H16 119.5 . . ? 
C17 C16 H16 119.5 . . ? 
C16 C17 C18 120.2(4) . . ? 
C16 C17 H17 119.9 . . ? 
C18 C17 H17 119.9 . . ? 
C13 C18 C17 118.6(4) . . ? 
C13 C18 H18 120.7 . . ? 
C17 C18 H18 120.7 . . ? 
C24 C19 C20 119.1(3) . . ? 
C24 C19 C12 120.7(2) . . ? 
C20 C19 C12 120.2(2) . . ? 
C21 C20 C19 120.6(3) . . ? 
C21 C20 H20 119.7 . . ? 
C19 C20 H20 119.7 . . ? 
C22 C21 C20 118.7(3) . . ? 
C22 C21 H21 120.6 . . ? 
C20 C21 H21 120.6 . . ? 
C23 C22 C21 122.3(3) . . ? 
C23 C22 N3 119.4(3) . . ? 
C21 C22 N3 118.3(3) . . ? 
C22 C23 C24 118.6(3) . . ? 
C22 C23 H23 120.7 . . ? 
C24 C23 H23 120.7 . . ? 
C19 C24 C23 120.7(3) . . ? 
C19 C24 H24 119.7 . . ? 
C23 C24 H24 119.7 . . ? 
C26 C25 C11 110.3(2) . . ? 
C26 C25 H25 124.9 . . ? 
C11 C25 H25 124.9 . . ? 
C25 C26 C27 126.6(3) . . ? 
C25 C26 S2 114.4(2) . . ? 
C27 C26 S2 119.1(2) . . ? 
C26 C27 H27A 109.5 . . ? 
C26 C27 H27B 109.5 . . ? 
H27A C27 H27B 109.5 . . ? 
C26 C27 H27C 109.5 . . ? 
H27A C27 H27C 109.5 . . ? 
H27B C27 H27C 109.5 . . ? 
C1 N1 C8 107.4(2) . . ? 
C1 N1 S1 121.13(19) . . ? 
C8 N1 S1 122.65(18) . . ? 
O4 N3 O3 123.3(3) . . ? 
O4 N3 C22 118.5(3) . . ? 
O3 N3 C22 118.2(3) . . ? 
O1 S1 O2 120.26(15) . . ? 
O1 S1 N1 106.83(14) . . ? 
O2 S1 N1 106.12(13) . . ? 
O1 S1 C13 108.63(16) . . ? 
O2 S1 C13 108.44(14) . . ? 
N1 S1 C13 105.61(12) . . ? 
C10 S2 C26 91.75(14) . . ? 
 
loop_ 
 _geom_torsion_atom_site_label_1 
 _geom_torsion_atom_site_label_2 
 _geom_torsion_atom_site_label_3 
 _geom_torsion_atom_site_label_4 
 _geom_torsion 
 _geom_torsion_site_symmetry_1 
 _geom_torsion_site_symmetry_2 
 _geom_torsion_site_symmetry_3 
 _geom_torsion_site_symmetry_4 
 _geom_torsion_publ_flag 
C6 C1 C2 C3 0.3(5) . . . . ? 
N1 C1 C2 C3 -176.0(3) . . . . ? 
C1 C2 C3 C4 0.2(5) . . . . ? 
C2 C3 C4 C5 -0.8(6) . . . . ? 
C3 C4 C5 C6 0.9(5) . . . . ? 
C4 C5 C6 C1 -0.3(4) . . . . ? 
C4 C5 C6 C7 176.7(3) . . . . ? 
C2 C1 C6 C5 -0.3(4) . . . . ? 
N1 C1 C6 C5 176.7(2) . . . . ? 
C2 C1 C6 C7 -178.0(3) . . . . ? 
N1 C1 C6 C7 -1.0(3) . . . . ? 
C5 C6 C7 C12 1.1(5) . . . . ? 
C1 C6 C7 C12 178.4(3) . . . . ? 
C5 C6 C7 C8 -175.8(3) . . . . ? 
C1 C6 C7 C8 1.5(3) . . . . ? 
C12 C7 C8 C9 -1.6(4) . . . . ? 
C6 C7 C8 C9 175.8(2) . . . . ? 
C12 C7 C8 N1 -178.7(2) . . . . ? 
C6 C7 C8 N1 -1.4(3) . . . . ? 
C7 C8 C9 C10 0.1(4) . . . . ? 
N1 C8 C9 C10 176.6(2) . . . . ? 
C8 C9 C10 C11 0.4(4) . . . . ? 
C8 C9 C10 S2 -179.7(2) . . . . ? 
C9 C10 C11 C12 0.7(4) . . . . ? 
S2 C10 C11 C12 -179.24(19) . . . . ? 
C9 C10 C11 C25 179.6(2) . . . . ? 
S2 C10 C11 C25 -0.3(3) . . . . ? 
C8 C7 C12 C11 2.5(4) . . . . ? 
C6 C7 C12 C11 -174.1(3) . . . . ? 
C8 C7 C12 C19 -176.9(2) . . . . ? 
C6 C7 C12 C19 6.6(4) . . . . ? 
C10 C11 C12 C7 -2.1(4) . . . . ? 
C25 C11 C12 C7 179.2(2) . . . . ? 
C10 C11 C12 C19 177.3(2) . . . . ? 
C25 C11 C12 C19 -1.4(4) . . . . ? 
C18 C13 C14 C15 0.0(5) . . . . ? 
S1 C13 C14 C15 -179.7(3) . . . . ? 
C13 C14 C15 C16 0.9(5) . . . . ? 
C14 C15 C16 C17 -0.9(7) . . . . ? 
C15 C16 C17 C18 0.0(7) . . . . ? 
C14 C13 C18 C17 -0.9(6) . . . . ? 
S1 C13 C18 C17 178.8(3) . . . . ? 
C16 C17 C18 C13 0.9(7) . . . . ? 
C7 C12 C19 C24 74.2(4) . . . . ? 
C11 C12 C19 C24 -105.2(3) . . . . ? 
C7 C12 C19 C20 -106.1(3) . . . . ? 
C11 C12 C19 C20 74.5(3) . . . . ? 
C24 C19 C20 C21 -1.8(5) . . . . ? 
C12 C19 C20 C21 178.5(3) . . . . ? 
C19 C20 C21 C22 1.7(5) . . . . ? 
C20 C21 C22 C23 -0.3(5) . . . . ? 
C20 C21 C22 N3 179.8(3) . . . . ? 
C21 C22 C23 C24 -1.0(5) . . . . ? 
N3 C22 C23 C24 178.9(3) . . . . ? 
C20 C19 C24 C23 0.4(5) . . . . ? 
C12 C19 C24 C23 -179.8(3) . . . . ? 
C22 C23 C24 C19 1.0(5) . . . . ? 
C12 C11 C25 C26 178.4(3) . . . . ? 
C10 C11 C25 C26 -0.4(3) . . . . ? 
C11 C25 C26 C27 -178.2(3) . . . . ? 
C11 C25 C26 S2 1.0(3) . . . . ? 
C2 C1 N1 C8 176.8(3) . . . . ? 
C6 C1 N1 C8 0.2(3) . . . . ? 
C2 C1 N1 S1 -34.9(4) . . . . ? 
C6 C1 N1 S1 148.4(2) . . . . ? 
C9 C8 N1 C1 -176.2(3) . . . . ? 
C7 C8 N1 C1 0.8(3) . . . . ? 
C9 C8 N1 S1 36.2(4) . . . . ? 
C7 C8 N1 S1 -146.89(19) . . . . ? 
C23 C22 N3 O4 -170.9(3) . . . . ? 
C21 C22 N3 O4 9.0(4) . . . . ? 
C23 C22 N3 O3 9.0(4) . . . . ? 
C21 C22 N3 O3 -171.1(3) . . . . ? 
C1 N1 S1 O1 48.2(2) . . . . ? 
C8 N1 S1 O1 -168.4(2) . . . . ? 
C1 N1 S1 O2 177.6(2) . . . . ? 
C8 N1 S1 O2 -39.0(2) . . . . ? 
C1 N1 S1 C13 -67.4(2) . . . . ? 
C8 N1 S1 C13 76.0(2) . . . . ? 
C18 C13 S1 O1 -5.6(3) . . . . ? 
C14 C13 S1 O1 174.1(2) . . . . ? 
C18 C13 S1 O2 -137.9(3) . . . . ? 
C14 C13 S1 O2 41.8(3) . . . . ? 
C18 C13 S1 N1 108.7(3) . . . . ? 
C14 C13 S1 N1 -71.6(3) . . . . ? 
C9 C10 S2 C26 -179.2(3) . . . . ? 
C11 C10 S2 C26 0.8(2) . . . . ? 
C25 C26 S2 C10 -1.1(2) . . . . ? 
C27 C26 S2 C10 178.2(3) . . . . ? 
 
_diffrn_measured_fraction_theta_max    1.000 
_diffrn_reflns_theta_full              27.00 
_diffrn_measured_fraction_theta_full   1.000 
_refine_diff_density_max    0.442 
_refine_diff_density_min   -0.364 
_refine_diff_density_rms    0.056 
